# Supplementary material
Source: Springer Nature journal article supplement (https://www.springermedizin.de/resource/supplementary/12986_2010_298_MOESM1_ESM.pdf/25655786)

**Figure 1**

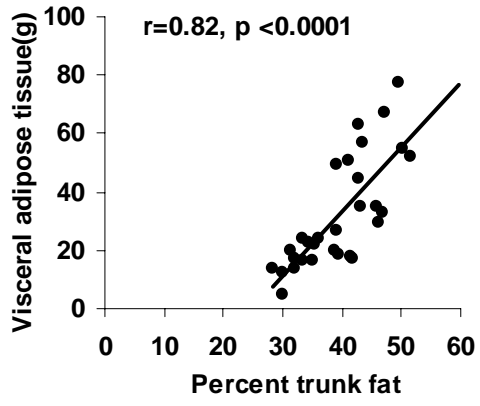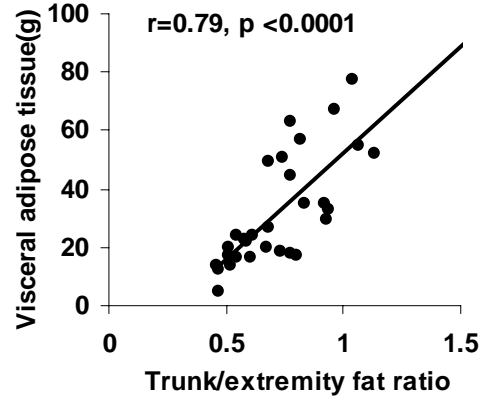

Supplement: MOESM1 [file 25655786]
